# Supplementary material
Source: Springer Nature journal article supplement (https://www.springermedizin.de/resource/supplementary/12885_2011_2782_MOESM1_ESM.pdf/9461854)
Supplement: MOESM1 [file 9461854]

Patients with  
**breast cancer**  
after  
**breast saving surgery**

Informed consent  
+  
study involvement

Randomisation

*Group A*

**IMRT**

with simultaneous,  
integrated Boost

*50,4/64,4 Gy in 28 fractions*

*Group B*

**conventional RT**

with sequential Boost

*50,4 Gy in 28 fractions +  
16 Gy in 8 fractions*

CT for  
radiation treatment  
planning

**Treatment**

**Follow-Up**

+  
adjuvant therapy when indicated
